1 **Article**

2 **Whole-genome-based *Helicobacter pylori* geographic surveillance: a visualized and**  
3 **expandable webtool**

4 Xiaosen Jiang<sup>1,2,3</sup> †, Zheng Xu<sup>1,4</sup> †, Tongda Zhang<sup>1</sup>, Yuan Li<sup>1</sup>, Wei Li<sup>1,2,3</sup> Hongdong Tan<sup>1\*</sup>

5 <sup>1</sup> BGI-Shenzhen, Shenzhen, 518083, China

6 <sup>2</sup> BGI Education Center, University of Chinese Academy of Sciences, Shenzhen 518083,  
7 China

8 <sup>3</sup> College of Life Sciences, University of Chinese Academy of Sciences, Beijing, 100049,  
9 China

10 <sup>4</sup> Shenzhen Key Laboratory of Unknown Pathogen Identification, BGI-Shenzhen, Shenzhen,  
11 China

12

13 † These authors contributed equally: Xiaosen Jiang and Zheng Xu

14

15 \* Corresponding Author

16 Hongdong Tan

17 Email: [rtan@mgi-tech.com](mailto:rtan@mgi-tech.com)

18

19

20

21

22

23 **Abstract**

24 *Helicobacter pylori* exhibits specific geographic distributions that related to the clinical  
25 outcomes. Despite the high infection rate of *H. pylori* throughout the world, the genetic  
26 epidemiology surveillance of *H. pylori* still needs to be improved. Here, we used single  
27 nucleotide polymorphisms (SNPs) profiling approach based on whole genome sequencing  
28 (WGS) that facilitates genomic population analyses of *H. pylori* and encourages the  
29 dissemination of microbial genotyping strategies worldwide. A total number of 1,211 public  
30 *H. pylori* genomes were downloaded and used to construct the typing tool, named as HPTT  
31 (*H. pylori* Typing Tool). Combined with the metadata, we developed two levels of genomic  
32 typing, including a continent scale and a country scale that nested in the continent scale.  
33 Results showed that Asia was the largest isolates source in our dataset, while isolates from  
34 Europe and Oceania were comparatively more widespread. More specifically, Switzerland  
35 and Australia are the main source of widespread isolates in their corresponding continents.  
36 To integrate all the typing information and enable researchers to compare their own dataset  
37 against the existing global database in an easy and rapid way, a user-friendly website  
38 (<https://db.cngb.org/HPTT/>) was developed with both genomic typing tool and visualization  
39 tool. To further confirm the validity of the website, ten newly assembled genomes were  
40 downloaded and tested precisely located on the branch as we expected. In summary, *H. pylori*  
41 typing tool (HPTT) is a novel genomic epidemiological tool that can achieve high resolution  
42 analysis of genomic typing and visualizing simultaneously, providing insights into the  
43 genetic population structure analysis, evolution analysis and epidemiological surveillance of  
44 *H. pylori*.

45

## 46 Introduction

47 *Helicobacter pylori* is one of the most sophisticated colonizers in the world that infects more  
48 than half of world's population ranged from infants to elders (Suerbaum and Michetti 2002).  
49 It is a Gram-negative bacterium that normally colonises at the gastric mucosa of human with  
50 about 10% infection result in diseases. The typical diseases were reported as gastritis, peptic  
51 ulcer, mucosa-associated lymphoid tissue (MALT) lymphoma and gastric cancer (Ernst and  
52 Gold 2000). Globally speaking, the risks of disease and the incidence and mortality of the  
53 gastric cancer were geographically different (Group 1993).

54 *H. pylori* displays a distinguished mutation rate among bacterial pathogens due to the lack of  
55 genes that initiates classical methyl-directed mismatch repair (MMR) (Alm, et al. 1999). The  
56 high mutation and recombination rate made *H. pylori* genomes with enormous plasticity,  
57 facilitating this pathogen perfectly adapted to its host (Kang and Blaser 2006; Didelot, et al.  
58 2013). It has been reported that *H. pylori* in chronic infection could be taken place through  
59 vertical and familial transmission (Agnew and Koella 1997; Messenger, et al. 1999). In  
60 within-host evolution, the mutation rate could reach ~ 30 single nucleotide polymorphisms  
61 (SNPs) per genome per year (Kennemann, et al. 2011), comparing to *Escherichia coli* at ~ 1  
62 SNP per genome per year (Reeves, et al. 2011). With the occurrence of large recombination  
63 events, a simple and efficient way to define the geographical pattern and epidemiological  
64 surveillance of *H. pylori* is crucially needed (Yamaoka 2009; Jolley, et al. 2018).

65 Among all genetic typing methods recorded in previous studies (Salama, et al. 2007;  
66 Yamaoka 2009), seven-gene multi-locus sequence typing (MLST) for *H. pylori* is a current  
67 popular tool due to its simple and rapid typing strategy. The 7-gene MLST covers genes  
68 including *atpA*, *efp*, *mutY*, *ppa*, *trpC*, *urel*, *yphC* that categorize *H. pylori* into different  
69 sequence types (STs) (Achtman, et al. 1999). This 7-gene MLST typing method enables  
70 regional specific recognition based on defined STs, through which geographical pattern may  
71 be linked with the different risk of clinical disease. For example, non-African and African  
72 lineage could be in association with different risk of gastric disease (Campbell, et al. 2001).  
73 However, the resolution of seven-gene MLST was still low, which limited us to trace the  
74 epidemiological origins of *H. pylori* strains. For users, submitting the microbial genomes is  
75 essential to get the allele number before getting the typing results. The seven-gene genotypes  
76 of *H. pylori* is diverse due to the high variability of *H. pylori* genomes, which hinders the  
77 recognition of patterns directly from the 4-digit code in 7-gene MLST. In addition, there is no

78 information of geographical patterns or visualization tool for seven-gene MLST, thus such  
79 related geographic patterns were hard to find when a new ST was found.

80 Here, we describe a *H. pylori* genomic typing tool, HPTT (*H. pylori* Typing Tool) using the  
81 SNP profiling based on whole-genome sequencing data. In addition to the genomic typing,  
82 HPTT also provides a phylogenetic and geographic visualization tool based on the Nextstrain  
83 framework (Hadfield, et al. 2018). This tool allows users to upload *H. Pylori* WGS data for  
84 genomic typing and uncover the possible transmission events of *H. Pylori*. It is believed that  
85 this tool can not only improve the genome typing resolutions, but also predict the origin of  
86 the epidemic *H. pylori* isolates, enabling the global surveillance of *H. pylori*.

87

## 88 **Methods**

### 89 ***H. pylori* genomes downloaded and filtered in this study**

90 A total number of 1,654 assembled *H. pylori* genomes were downloaded from NCBI RefSeq  
91 database (genomes available as of 4th May 2020) using ncbi-genome-download tool (version  
92 0.2.12). The corresponding metadata of assembled genomes was searched by function using  
93 Entrez Direct (version 10.9) (Kans 2020). By metadata filtering, 1,211 genomes were  
94 selected with sample collection location available (**Table 1**). All genomes were scanned by  
95 mlst (version 2.11) with the library of MLST updated on 31 December 2020 (Jolley and  
96 Maiden 2010).

### 97 **SNP analysis**

98 The 1,211 assembled genomes were mapped to the reference genome *H. pylori* 26695  
99 (GenBank: AE000511.1) (Tomb, et al. 1997) using MUMmer (version 3.23) (Kurtz, et al.  
100 2004). SNPs were filtered with a minimum mapping quality cutoff at 0.90 across 1,211  
101 assembled *H. pylori* genomes. 6,129 SNPs were found, and a SNP profile of *H. Pylori* is  
102 established for the corresponding isolates.

### 103 **Phylogenetic analysis**

104 The maximum likelihood (ML) phylogenetic tree was constructed by iqtree (version 2.0.3)  
105 (Nguyen, et al. 2015) based on 6,129 SNPs alignments of all 1,211 isolates. The reference



106 genome *H. pylori* 26695 was used as outgroup. The tree was generalized by the Gamma  
107 distribution to model site-specific rate variation (the GTR model). Bootstrap pseudo-analyses  
108 of the alignment were set at  $\geq 1000$ . All ML trees were visualized and annotated using  
109 Figtree (version 1.4.4). The minimum spanning tree was constructed by the GrapeTree  
110 (v1.5.0) (Zhou, et al. 2018).

### 111 **Geographic typing system**

112 Based on the phylogenetic tree, two levels of geographic group were defined, including the  
113 first level defined at the continent scale and the second level defined as country specific  
114 scale. In the first level of genotyping, lineages that carrying more than seven isolates and  $>$   
115 75% isolates sourced from one major continent were defined as a continent specific group or  
116 clade. A mixed continent group was defined when there was no major continent identified  
117 with isolates at  $>75\%$ . In the second level, lineages carrying more than one isolate and  $> 75\%$   
118 isolates sourced from one major country were defined as a country specific group or  
119 subclade. In addition, a mixed group was also defined at level two when there were more  
120 than two isolates and not a major country identified with isolates at  $> 75\%$ . The association of  
121 the genomic lineage of *H. Pylori* with the geographic origin of isolates fully sequenced  
122 provide a map to allow us tracing both the origin and evolution path of a detected or  
123 sequenced *H. Pylori* genome.

### 124 **Establishment of *H. pylori* database**

125 The HPTT website was established based on two modules: 1) The genomic-geographical  
126 typing tool of *H. pylori* isolates and 2) a visualization tool of both the genomic and  
127 geographic typing results. The online typing tool was written in PHP, Javascript, css, and  
128 html. The online visualization service was performed based on the CodeIgniter framework  
129 (<https://www.codeigniter.com/>), tree visualization was analysed by the augur  
130 (<https://github.com/nextstrain/augur>) bioinformatics tool and the auspice  
131 (<https://github.com/nextstrain/auspice>) visualization tool imbedded in the Nextstrain  
132 (Hadfield, et al. 2018) open source project. The *H. pylori* database was stored in a Mysql  
133 database.

134

135

## 136 Results

### 137 Definition of two levels of geographic genotypes for *H. pylori*

138 A total of 1,211 assembled genomes with available geographic information from NCBI  
139 RefSeq database were downloaded and analyzed for establishing the *H. pylori* genotyping  
140 database (**Supplementary Table 1**). All assembly genomes were mapped to the reference  
141 genome *H. pylori* 26695. Based on the maximum likelihood tree, while 6,129 SNPs were  
142 defined for further genomic typing. In terms of geographic information, 1,112 isolates were  
143 grouped at two levels, including 37 continent-level groups (**Figure 1A**) and/or 236 country-  
144 level groups (**Figure 1C**). The median pairwise distances between isolates were found as  
145 follows: 319 SNPs within continent clades and 1,493 SNPs within country subclades. We  
146 labelled these continent clades and country subclades using a structured hierarchical  
147 nomenclature system similar to that used for *M. tuberculosis* (Coll, et al. 2014). For instance,  
148 region 1 clade (G1) is subdivided into country subclades G1.C1 and G1.C2.

### 149 A continent level genomic typing for *H. pylori*

150 A total number of 37 continent level of groups (n=1,112) were defined, including 25  
151 continent specific groups and the 12 mixed continent groups (**Figure 1A&B**). Isolates across  
152 the tree did not fall into the continent group but can be defined as country group were named  
153 as G0 (n=74). Isolates across the tree neither fall into the country group nor continent group  
154 was defined as non-grouped (n=25).

155 There were five continent specific groups contained more than 75% Asian isolates,  
156 supporting Asia to be the continent with the largest isolate source (n=319, 26.34%) (**Figure**  
157 **2A**). North America was found to be the second largest group of isolate pool which consisted  
158 six continent specific groups (n=132, 10.90%). Although less isolates were found sourced  
159 from Europe (n=109, 9.00%), these isolates were distributed in nine continent specific  
160 groups. Two groups (G16 & G29) of isolates were found as Oceania specific group (n=39,  
161 3.22%) and three groups (G1 & G26 & G35) were found as South America specific groups  
162 (n=109, 9.00%). In addition, the 12 mixed groups of isolates contained 226 isolates  
163 (18.66%). Among all G level groups, G2 was the largest continent specific group (n=223)  
164 that mainly contained isolates from Asia (193/223, 82.83%), while G35 was the second  
165 largest continent specific group (n=109) that mainly contained isolates from South America  
166 (99/109, 87.61%). Apart from all the continent groups above, there was no Africa specific

167 group found, but only with isolates collected from Africa defined in G28 (n=2), G37 (n=7)  
168 and G29 (n=1) (**Figure 2**).

169 Although the continent specific groups did not 100% stick to one continent in our typing  
170 system, the transmission events were still possible to trace. While most of the Asian isolates  
171 fell into the Asia groups, a small proportion of the Asian isolates belonged to the mixed  
172 groups. Similarly, most of the isolates sourced from North America and South America fell  
173 in their own region groups, while a minority of the isolates were in the mixed groups.  
174 Interestingly, isolates from Oceania and Europe could be found across all 12 mixed continent  
175 groups, reflecting that *H. pylori* isolates from these two continents were relatively wide  
176 spread of across the globe.

### 177 **The nested country level genomic typing for *H. pylori***

178 A total number of 859 isolates were grouped into 216 geographic patterns at country level,  
179 which was predominant in 29 countries across six continents (**Figure 3**). Among these 29  
180 countries encompassing 216 groups, 20 countries found in 168 groups were defined as  
181 country-specific groups, while the rest 9 countries were scattered in the rest 48 country-level  
182 mixed groups.

183 G35.C07 was the largest country specific group that contained 49 isolates from Colombia,  
184 followed by the G35.C05 (n=35) dominated in Colombia as well. These isolates from  
185 Colombia were mainly collected from the NCBI Bioproject PRJNA352848, which study  
186 contained the population structure of *H. pylori* in regional evolution in South America  
187 (Muñoz-Ramírez, et al. 2017). The isolates from group G35.C07 and G35.C05 were mainly  
188 found from Colombia, Mexico and Spain (**Figure 3**). This result provided the evidence that  
189 the *H. pylori* isolates were possibly transmitted from Spain and spread locally in South  
190 America and North America. In comparison, Australia and Switzerland were the largest  
191 countries of isolate source which isolates scattered across more than half of the country  
192 specific groups.

193 When comparing the percentage of isolates from different countries, those isolates from  
194 France, Germany, Malaysia, Nicaragua, Sweden, and UK were found scattered in more than  
195 one continent group, while isolates from Cambodia, Colombia, India, Peru, Spain and US  
196 were focused in one continent group when they were also found in other continent groups.

197 More importantly, Australia and Switzerland were two countries that mostly found with  
198 scattered isolates in different regional specific groups.

199 Three clusters were observed in the percentage of different isolate sources at continent scale  
200 (G32 to G25 with red branches in Figure 3), consisting of groups from Europe and mixed  
201 continents. Specifically, those isolates from mixed groups were mainly sourced from  
202 European and Oceania countries, making this cluster as Europe-Oceania dominated. The  
203 second cluster was the mixed by Asian, Oceanian, European and mixed groups (G4 to G2  
204 with green branches in Figure 3) but dominated by isolates from Australia and Asian  
205 countries. Therefore, cluster two was specified as Asian-Pacific cluster. The third cluster was  
206 formed by North American groups (G31 to G37 with purple branches in Figure 3), while  
207 South American branches was next to the North America cluster.

## 208 **Comparing with seven-gene MLST**

209 Seven-gene MLST was implied to get sequence types (STs) of all 1,211 isolates.  
210 Unfortunately, due to the high mutation rate of the *H. pylori* strains, most of the seven-gene  
211 allele were only found with high similarity instead of an accurate type, as the result, a large  
212 number of isolates (n=876, 72.3%) were untyped in our dataset (**Supplementary Table 1 &**  
213 **Figure 1**). However, despite the most of undefined isolates, the typed isolates with exact ST  
214 number would still be grouped closely by minimum spanning tree.

## 215 **A user-friendly typing website**

216 In order to support our *H. pylori* geographic typing tool, a user-friendly typing website was  
217 established and available at <https://db.cngb.org/HPTT/>. Our HTTP approach is compatible  
218 with any whole-genome sequencing (WGS) data with metadata (**Figure 4**). For the  
219 sequencing data from pure-cultured isolates, the assembled genomes can be directly  
220 submitted to our website. However, it is worth noting that sequences or assembled genomes  
221 needed to be extracted from metagenome samples before submission (Parks, et al. 2017;  
222 Olekhnovich, et al. 2019). Except for the sequenced genome data, the available assembled  
223 contigs from NCBI Sequence Read Archive (SRA) or assembly database (RefSeq), or other  
224 genome databases (e.g., European Nucleotide Achieve) can also be directly uploaded to our  
225 website. By using MUMmer alignment and blast process, the uploaded genome can be  
226 located to the closest matching genomes, further facilitating the possible transmission route  
227 analysis across the globe. In addition, our database can be also linked to the NCBI genome

228 database, helping the user easily locate the metadata information from the available database  
229 (**Supplementary materials**).

230 Except for the typing tool, the Nextstrain framework was also embedded in our website. By  
231 clicking the uploaded genome number, information can be linked to the phylogenetic tree  
232 with corresponding continent and country. Possible evolution relationships and interactive  
233 located functions have made our typing tools easy to be applied and understood.

234 Ten genomes that newly uploaded to NCBI were downloaded and tested for the accuracy of  
235 the typing method and the efficiency of our website (**Supplementary Table 2**). Since our  
236 typing tool was established based on the MPS (Massive Parallel Sequencing) data, the first  
237 genome (GCF\_002206465.1) sequenced by Pacbio was failed to be assigned groups. The rest  
238 nine genomes were typed successfully.

239

## 240 **Discussion**

241 The epidemiological patterns of *H. pylori* isolates have been reported with specific  
242 geographic characteristics. In this study, the new typing webtool HPTT not only illustrated  
243 the population structure of *H. pylori* but also made the genomic typing easy to approach. In  
244 the continent level of typing, 1,112 isolates were grouped into 37 continent specific patterns.  
245 Except for 12 continent mixed groups, the rest could be defined as continent specific groups  
246 across the five continents. Isolates from Europe and Oceania were universally found in most  
247 of the continent-level groups (Europe 33/37, 89.19% and Oceania 26/37, 70.27%),  
248 illustrating that isolates from these two continents were widely spread across the world.

249 In the country level of typing, 1,045 isolates were grouped into 216 country level of groups.  
250 Most of the isolates were defined as country specific groups (168/216, 77.77%), while the  
251 rest of the isolates were grouped as country mixed groups (48/216, 22.22%). Australian and  
252 Swiss isolates were found to be widespread around the world, while isolates from Columbia  
253 was more regional specific. It has been reported that *H. pylori* in South America was  
254 originally transmitted from Spain (Muñoz-Ramírez, et al. 2017), this data perfectly aligned  
255 with our results in G35.C05 and G35.C07, giving the support of the accuracy of our genomic  
256 typing method.

257 In this study, except for the novel typing tool, a user-friendly website was also established.  
258 By using this typing tool, users can achieve fast and precise genomic typing, easily locating  
259 the possible origins and transmission events across the world. When located in the actual  
260 geographic group, it is easily for users to check the details of the corresponding composition  
261 of the branches in our database. The genome with the highest identity can be easily linked to  
262 the NCBI database as well as the visualization tool where the dynamic evolution of *H. pylori*  
263 was shown. At the same time, seven-gene MLST results were displayed for each genome in  
264 database.

265 The most interesting part of HPTT tool and methodology allow us to perform genome typing  
266 with assembled genomes from the metagenomics samples, as illustrated in Figure 4. Due to  
267 rapid mutation of *H. pylori*, it is most likely that the sample from one's gut are heterogeneity  
268 in nature. The whole genome sequencing by combining sequencing libraries labelled with  
269 different barcodes on a meta sample, and a cultured pure isolate could yield enough data from  
270 one single run to perform the epidemiological surveillance of *H. pylori* on a global level to  
271 find the origins in evolution profile. An open-source assay protocol will be developed and  
272 shared in the future to combine with this HTTP tool to enable the epidemiological  
273 surveillance of *H. pylori*.

274 Although our typing tool filled the gap of genetic epidemiological surveillance of *H. pylori*,  
275 some of the functions still need to be improved. For example, cytotoxin-associated gene A  
276 (*cagA*) and *vacA* were the two crucial genes that reported to be correlated with geographic  
277 patterns of *H. pylori* (Yamaoka 2009; Breurec, et al. 2011). The *cagA* gene is one of the most  
278 important virulence genes in *H. pylori*, located at the end of *cag* pathogenicity island (*cag*  
279 PAI) that encodes 120–145 kDa CagA protein (Šterbenc, et al. 2019). Another virulence  
280 factor was vacuolating cytotoxin encoded by the gene *vacA* (Šterbenc, et al. 2019). The  
281 variation of these two genes were widely reported by the *H. pylori* groups that can reflect the  
282 genomic different for different geographic patterns. However, such rapid typing method on a  
283 website for these two genes are still lacking, which could be considered in the further HPTT  
284 version 2.

285 *H. pylori* is normally treated by the antibiotics without antimicrobial susceptibility testing  
286 (Pohl, et al. 2019). Antibiotics-resistant *H. pylori* has been reported related to several  
287 mutations within the genes *pbp1A*, *23S rRNA*, *gyrA*, *rdxA*, *frxA*, and *rpoB* (Domanovich-  
288 Asor, et al. 2021). In version 2, these antibiotics-resistant genes will be included in our

289 second version despite an antibiotic-resistant specific tool was available now (Yusibova, et  
290 al. 2020). As more or more strains or isolates are deposited into our database with the  
291 geographic information, the HPTT tool will be evolve into a more powerful tool to associate  
292 the genomic typing information with its origin and phenotypes.

293 In summary, this work illustrates the efforts in global epidemiological study of *H. pylori*  
294 isolates. Two functions were designed for the web typing tool, one for genomic typing and  
295 the other for phylogenetic and geographic visualization. The accuracy of our genomic typing  
296 system was proved by ten unused genomes as well as another published study (Muñoz-  
297 Ramírez, et al. 2017). Together with the visualization tool, the genomic population structure  
298 of *H. pylori* with geographic documents were described. Future studies based on this  
299 approach will be expanded by the crucial virulence gene and antibiotic related genes. This  
300 tool would be beneficial for the surveillance of *H. pylori* for public health and the monitoring  
301 of its epidemic development.

### 302 **Acknowledgements**

303 This study was supported by the Science, Technology and Innovation Commission of  
304 Shenzhen Municipality under grant (No. JCYJ20170412153155228). We thank China  
305 National GeneBank at Shenzhen for supporting this study.

### 306 **Data Availability**

307 All assembled *H. pylori* genomes were downloaded from NCBI assembly database.

308

### 309 **References**

310 Achtman M, Azuma T, Berg DE, Ito Y, Morelli G, Pan ZJ, Suerbaum S, Thompson SA, Van  
311 Der Ende A, Van Doorn LJ. 1999. Recombination and clonal groupings within *Helicobacter*  
312 *pylori* from different geographical regions. *Molecular microbiology* 32:459-470.  
313 Agnew P, Koella JC. 1997. Virulence, parasite mode of transmission, and host fluctuating  
314 asymmetry. *Proceedings of the Royal Society of London. Series B: Biological Sciences*  
315 264:9-15.



- 316 Alm RA, Ling L-SL, Moir DT, King BL, Brown ED, Doig PC, Smith DR, Noonan B, Guild  
317 BC, DeJonge BL. 1999. Genomic-sequence comparison of two unrelated isolates of the  
318 human gastric pathogen *Helicobacter pylori*. *Nature* 397:176-180.
- 319 Breurec S, Guillard B, Hem S, Papadakos KS, Brisse S, Huerre M, Monchy D, Oung C,  
320 Sgouras DN, Tan TS. 2011. Expansion of European *vacA* and *cagA* alleles to East-Asian  
321 *Helicobacter pylori* strains in Cambodia. *Infection, Genetics and Evolution* 11:1899-1905.
- 322 Campbell DI, Warren BF, Thomas JE, Figura N, Telford JL, Sullivan PB. 2001. The African  
323 enigma: low prevalence of gastric atrophy, high prevalence of chronic inflammation in West  
324 African adults and children. *Helicobacter* 6:263-267.
- 325 Coll F, McNerney R, Guerra-Assunção JA, Glynn JR, Perdigao J, Viveiros M, Portugal I,  
326 Pain A, Martin N, Clark TG. 2014. A robust SNP barcode for typing *Mycobacterium*  
327 tuberculosis complex strains. *Nature communications* 5:1-5.
- 328 Didelot X, Nell S, Yang I, Woltemate S, Van der Merwe S, Suerbaum S. 2013. Genomic  
329 evolution and transmission of *Helicobacter pylori* in two South African families. *Proceedings*  
330 *of the National Academy of Sciences* 110:13880-13885.
- 331 Domanovich-Asor T, Craddock HA, Motro Y, Khalfin B, Peretz A, Moran-Gilad J. 2021.  
332 Unraveling antimicrobial resistance in *Helicobacter pylori*: Global resistome meets global  
333 phylogeny. *Helicobacter*:e12782.
- 334 Ernst PB, Gold BD. 2000. The disease spectrum of *Helicobacter pylori*: the  
335 immunopathogenesis of gastroduodenal ulcer and gastric cancer. *Annual Reviews in*  
336 *Microbiology* 54:615-640.
- 337 Group ES. 1993. Epidemiology of, and risk factors for, *Helicobacter pylori* infection among  
338 3194 asymptomatic subjects in 17 populations. The EUROGAST Study Group. *Gut* 34:1672-  
339 1676.
- 340 Hadfield J, Megill C, Bell SM, Huddlestone J, Potter B, Callender C, Sagulenko P, Bedford T,  
341 Neher RA. 2018. Nextstrain: real-time tracking of pathogen evolution. *bioinformatics*  
342 34:4121-4123.
- 343 Jolley KA, Bray JE, Maiden MC. 2018. Open-access bacterial population genomics: BIGSdb  
344 software, the PubMLST.org website and their applications. *Wellcome open research* 3.
- 345 Jolley KA, Maiden MC. 2010. BIGSdb: scalable analysis of bacterial genome variation at the  
346 population level. *BMC bioinformatics* 11:1-11.
- 347 Kang J, Blaser MJ. 2006. Bacterial populations as perfect gases: genomic integrity and  
348 diversification tensions in *Helicobacter pylori*. *Nature Reviews Microbiology* 4:826-836.



349 Kans J. 2020. Entrez direct: E-utilities on the UNIX command line. In. Entrez Programming  
350 Utilities Help [Internet]: National Center for Biotechnology Information (US).

351 Kennemann L, Didelot X, Aebischer T, Kuhn S, Drescher B, Droege M, Reinhardt R, Correa  
352 P, Meyer TF, Josenhans C. 2011. *Helicobacter pylori* genome evolution during human  
353 infection. *Proceedings of the National Academy of Sciences* 108:5033-5038.

354 Kurtz S, Phillippy A, Delcher AL, Smoot M, Shumway M, Antonescu C, Salzberg SL. 2004.  
355 Versatile and open software for comparing large genomes. *Genome biology* 5:R12.

356 Messenger SL, Molineux IJ, Bull J. 1999. Virulence evolution in a virus obeys a trade off.  
357 *Proceedings of the Royal Society of London. Series B: Biological Sciences* 266:397-404.

358 Muñoz-Ramírez ZY, Mendez-Tenorio A, Kato I, Bravo MM, Rizzato C, Thorell K, Torres R,  
359 Aviles-Jimenez F, Camorlinga M, Canzian F. 2017. Whole genome sequence and  
360 phylogenetic analysis show *Helicobacter pylori* strains from Latin America have followed a  
361 unique evolution pathway. *Frontiers in cellular and infection microbiology* 7:50.

362 Nguyen L-T, Schmidt HA, Von Haeseler A, Minh BQ. 2015. IQ-TREE: a fast and effective  
363 stochastic algorithm for estimating maximum-likelihood phylogenies. *Molecular biology and  
364 evolution* 32:268-274.

365 Olekhovich EI, Manolov AI, Samoilov AE, Prianichnikov NA, Malakhova MV, Tyakht  
366 AV, Pavlenko AV, Babenko VV, Larin AK, Kovarsky BA. 2019. Shifts in the human gut  
367 microbiota structure caused by quadruple *Helicobacter pylori* eradication therapy. *Frontiers  
368 in microbiology* 10:1902.

369 Parks DH, Rinke C, Chuvochina M, Chaumeil P-A, Woodcroft BJ, Evans PN, Hugenholtz P,  
370 Tyson GW. 2017. Recovery of nearly 8,000 metagenome-assembled genomes substantially  
371 expands the tree of life. *Nature microbiology* 2:1533-1542.

372 Pohl D, Keller PM, Bordier V, Wagner K. 2019. Review of current diagnostic methods and  
373 advances in *Helicobacter pylori* diagnostics in the era of next generation sequencing. *World  
374 journal of gastroenterology* 25:4629.

375 Reeves PR, Liu B, Zhou Z, Li D, Guo D, Ren Y, Clabots C, Lan R, Johnson JR, Wang L.  
376 2011. Rates of mutation and host transmission for an *Escherichia coli* clone over 3 years.  
377 *PloS one* 6:e26907.

378 Salama NR, Gonzalez-Valencia G, Deatherage B, Aviles-Jimenez F, Atherton JC, Graham  
379 DY, Torres J. 2007. Genetic analysis of *Helicobacter pylori* strain populations colonizing the  
380 stomach at different times postinfection. *Journal of bacteriology* 189:3834-3845.

381 Šterbenc A, Jarc E, Poljak M, Homan M. 2019. *Helicobacter pylori* virulence genes. *World  
382 journal of gastroenterology* 25:4870.

383 Suerbaum S, Michetti P. 2002. *Helicobacter pylori* infection. *New England journal of*  
384 *medicine* 347:1175-1186.

385 Tomb J-F, White O, Kerlavage AR, Clayton RA, Sutton GG, Fleischmann RD, Ketchum KA,  
386 Klenk HP, Gill S, Dougherty BA. 1997. The complete genome sequence of the gastric  
387 pathogen *Helicobacter pylori*. *Nature* 388:539-547.

388 Yamaoka Y. 2009. *Helicobacter pylori* typing as a tool for tracking human migration.  
389 *Clinical Microbiology and Infection* 15:829-834.

390 Yusibova M, Hasman H, Clausen PTLC, Imkamp F, Wagner K, Andersen LP. 2020. CRHP  
391 Finder, a webtool for the detection of clarithromycin resistance in *Helicobacter pylori* from  
392 whole-genome sequencing data. *Helicobacter* 25:e12752.

393 Zhou Z, Alikhan N-F, Sergeant MJ, Luhmann N, Vaz C, Francisco AP, Carriço JA, Achtman  
394 M. 2018. GrapeTree: visualization of core genomic relationships among 100,000 bacterial  
395 pathogens. *Genome research* 28:1395-1404.

396

397

398 **Table 1 Summary of 1,211 *H. pylori* genomes**

| <b>Continent</b> | <b>Country (region) of origin</b> | <b>Number of isolates</b> |
|------------------|-----------------------------------|---------------------------|
| Asia             |                                   | 312 (25.76%)              |
|                  | Cambodia                          | 53                        |
|                  | China                             | 74                        |
|                  | China (Taiwan)                    | 8                         |
|                  | India                             | 47                        |
|                  | Indonesia                         | 1                         |
|                  | Japan                             | 31                        |
|                  | Kuwait                            | 2                         |
|                  | Malaysia                          | 79                        |
|                  | North Korea                       | 1                         |
|                  | Singapore                         | 14                        |
|                  | South Korea                       | 1                         |
|                  | Vietnam                           | 1                         |
| Africa           |                                   | 10 (0.82%)                |
|                  | Morocco                           | 6                         |
|                  | Nigeria                           | 1                         |
|                  | South Africa                      | 3                         |
| Europe           |                                   | 294 (24.28%)              |
|                  | Belarus                           | 2                         |
|                  | Belgium                           | 6                         |
|                  | France                            | 37                        |
|                  | Germany                           | 31                        |
|                  | Ireland                           | 1                         |
|                  | Poland                            | 2                         |
|                  | Portugal                          | 1                         |
|                  | Russia                            | 3                         |
|                  | Spain                             | 54                        |
|                  | Sweden                            | 19                        |
|                  | Switzerland                       | 130                       |
|                  | United Kingdom                    | 8                         |
| Oceania          |                                   | 178 (14.70%)              |
|                  | Australia                         | 177                       |
|                  | Papua New Guinea                  | 1                         |
| North America    |                                   | 233 (19.24%)              |
|                  | Canada                            | 2                         |
|                  | El Salvador                       | 1                         |
|                  | Mexico                            | 118                       |
|                  | Nicaragua                         | 24                        |
|                  | United States of America          | 88                        |
| South America    |                                   | 184 (15.19%)              |

|          |     |
|----------|-----|
| Angola   | 1   |
| Colombia | 172 |
| Peru     | 11  |

399

400

401 **Figures and Figure legends**

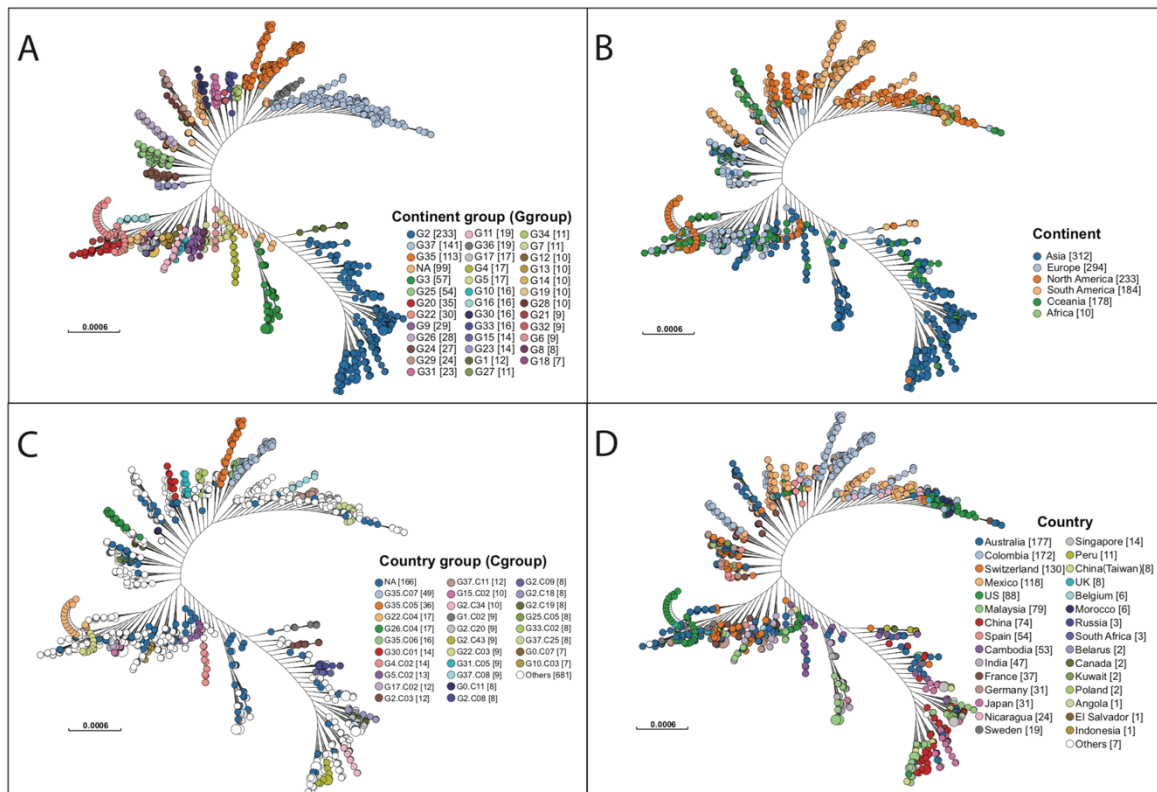

402

403 **Figure 1. Two Clades of geographic typing based on the WGS.** The HPTT enrolled 1,211  
 404 *H. pylori* genomes downloaded from NCBI. The clade nodes in each figure are corresponding  
 405 to A) G groups for continent level of typing, B) the continent that isolate collected from, C) C  
 406 groups for country level of typing, D) the country that isolates collected from. Numbers in  
 407 parenthesis refer to the number of isolates in each genogroups.

408

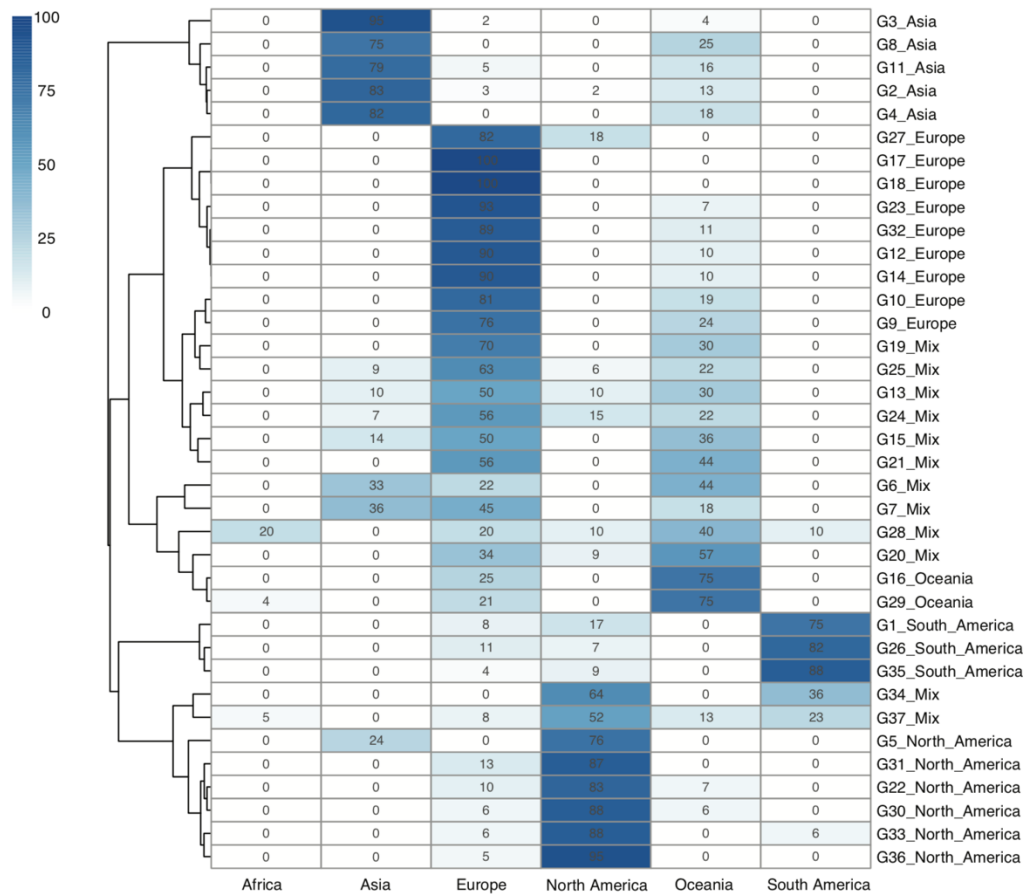

409

410 **Figure 2. Geographical clustering of *H. pylori* continent clades.** The number in each cube  
 411 represents the percentage of unique isolates sourced from each of the continents. A total  
 412 number of 37 continent level of groups were defined. The deeper the colour, the higher the  
 413 percentage of the isolates in that continent level of clade groups. Also, a phylogenetic tree is  
 414 shown in the left side of the table. The background information of isolates is provided in  
 415 Supplementary Table 1.

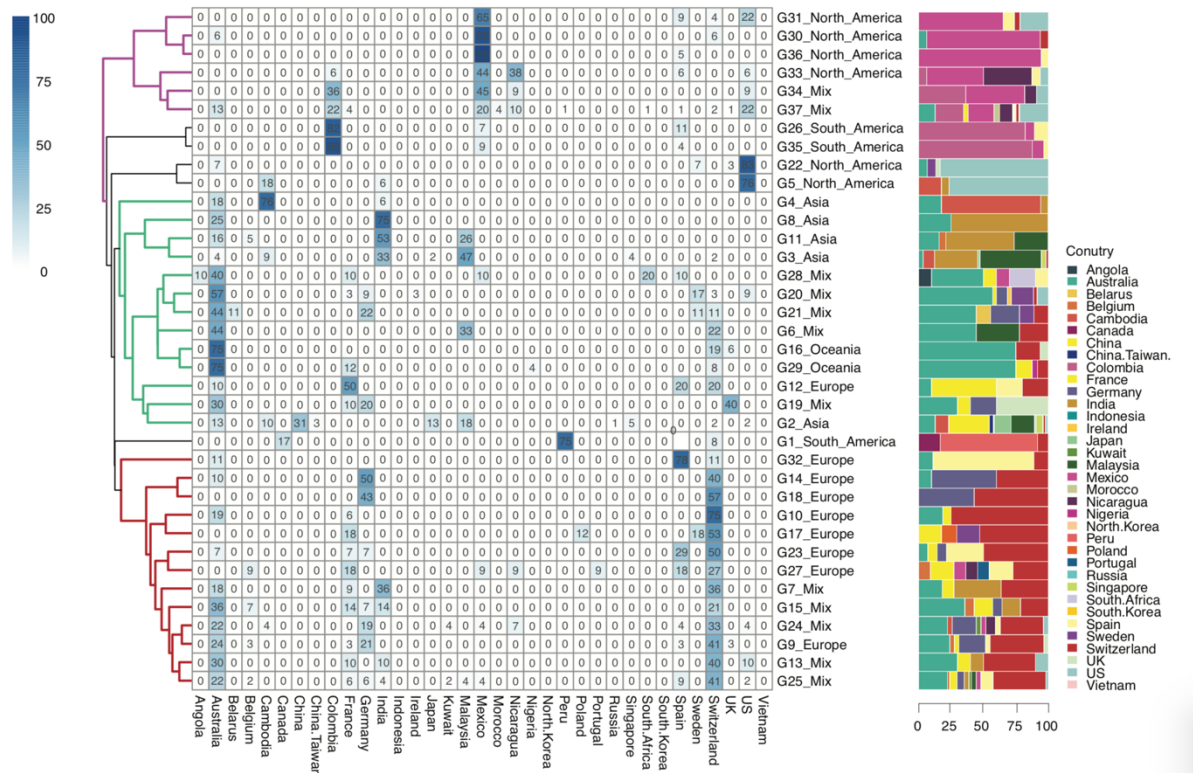

416

417 **Figure 3. Geographical clustering of *H. pylori* country subclades.** The number in each  
 418 cube represents the percentage of unique isolates sourced from each of the country in that  
 419 continent groups. A total number of 216 country level of groups were defined. The deeper the  
 420 colour, the higher the percentage of the isolates sourced from that country in continent level  
 421 of groups. The background information of isolates is provided in Supplementary Table 1.

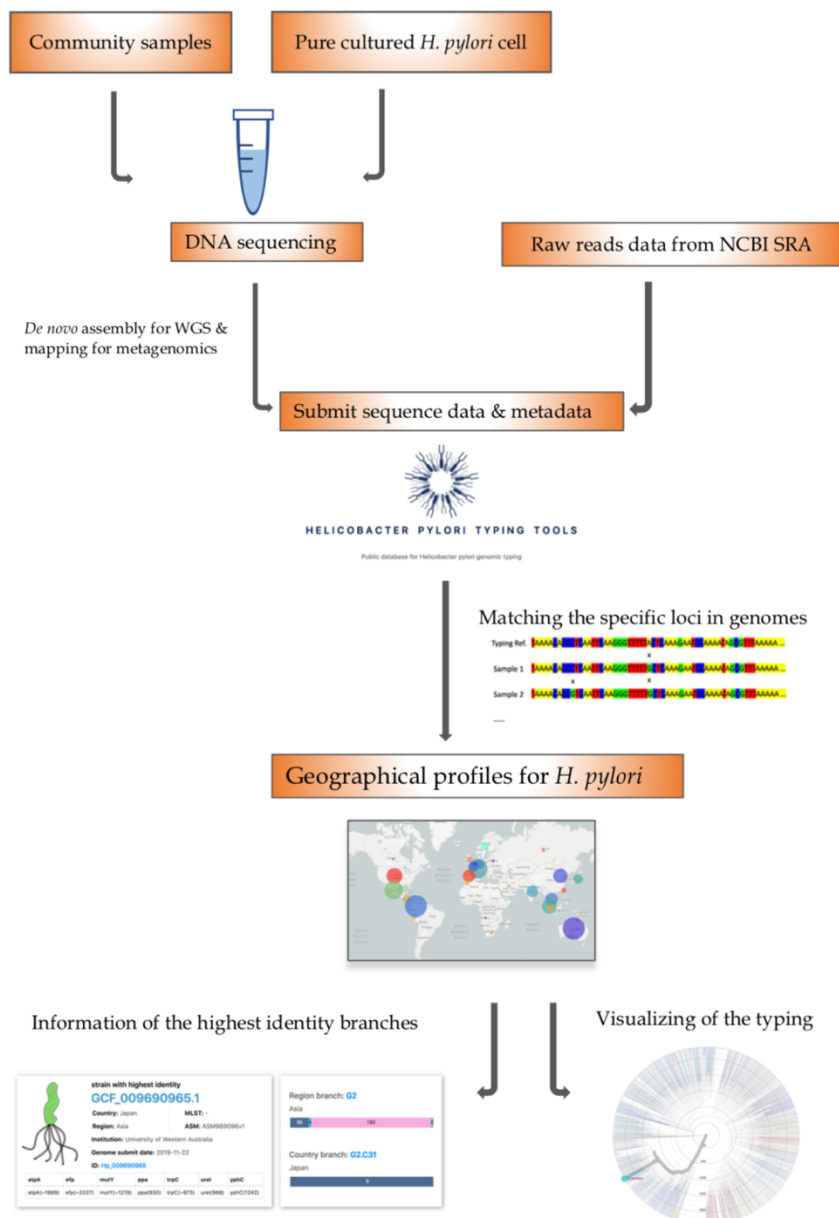

422

423 **Figure 4. The HPTT workflow.** The SNP based genotyping approach can be used with the  
424 Whole Genome Sequencing (WGS) data, which can be acquired in following ways: DNA can  
425 be extracted from a pure cultured bacterial cell with WGS data or a community sample with  
426 metagenomic sequencing data. After being sequenced by an appropriate platform, the  
427 assembled genomes can be directly submitted to our database. In addition, the public  
428 assembled data also can be directly submitted to our database. The downstream analyses of  
429 the aligned sequence data can be linked to the phylogenetic and geographic page.



A

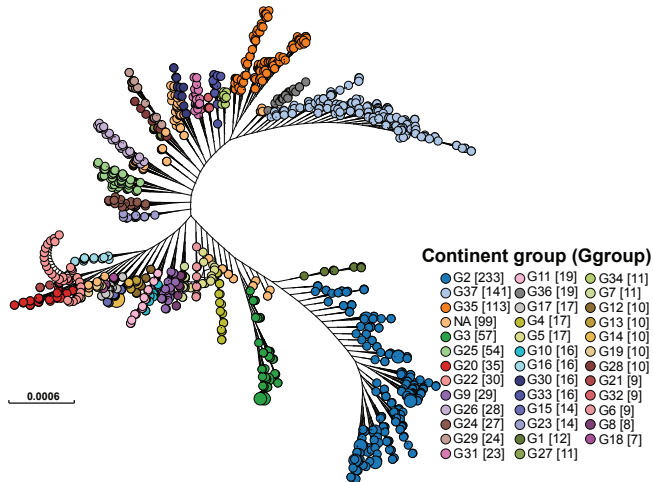

B

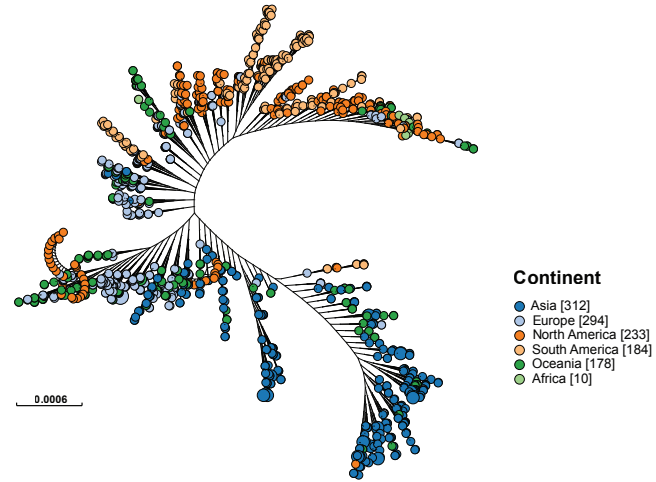

C

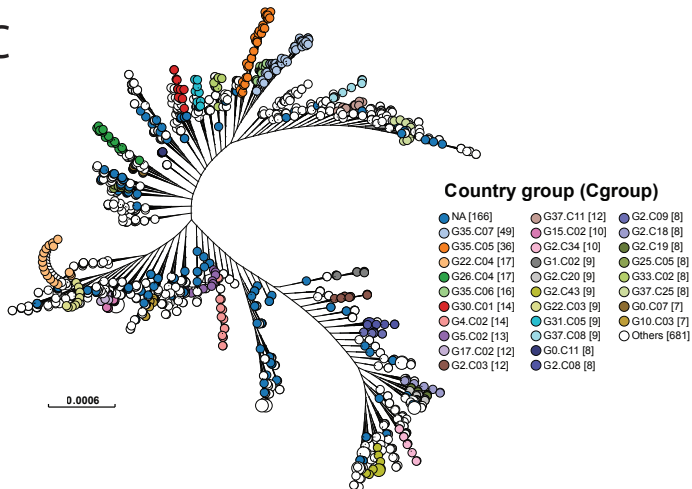

D

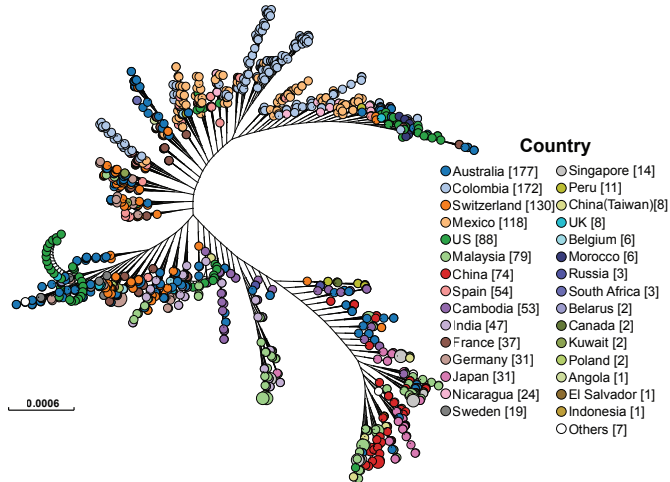



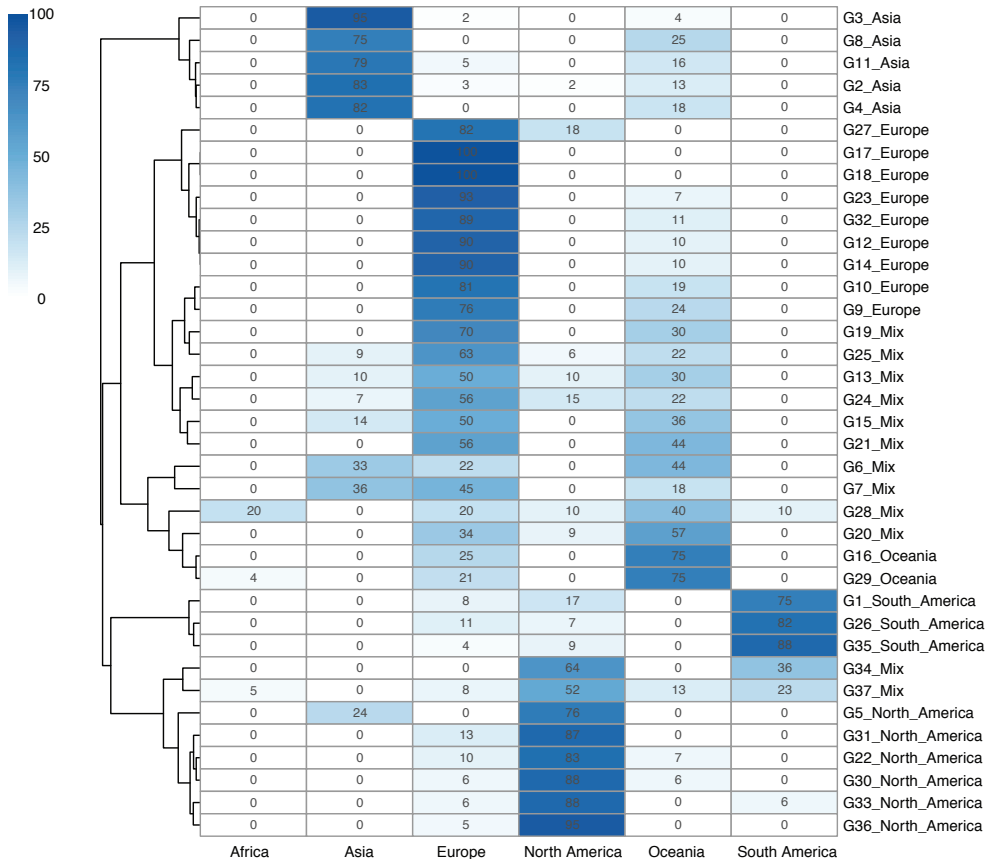



Community samples

Pure cultured *H. pylori* cell

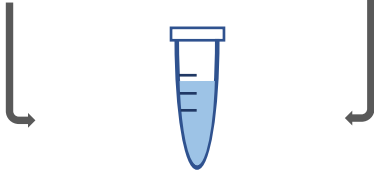

DNA sequencing

Raw reads data from NCBI SRA

*De novo* assembly for WGS & mapping for metagenomics

Submit sequence data & metadata

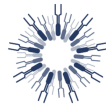

HELICOBACTER PYLORI TYPING TOOLS

Public database for Helicobacter pylori genomic typing

Matching the specific loci in genomes

Typing Ref. **A**AAAA**A**AGCT**T**AA**T**CAAGGG**T**TTT**T**TA**T**CAAA**G**AA**T**CAAAA**A**AG**G**TT**A**AAAA  
x  
Sample 1 **A**AAAA**A**AGCT**T**AA**T**CAAGGG**T**TTT**G**TTAA**G**AA**T**CAAAA**A**AG**G**TT**A**AAAA  
x  
Sample 2 **A**AAAA**A**AG**T**AA**T**CAAGGG**T**TTT**G**TTAA**G**AA**T**CAAAA**A**AG**G**TT**A**AAAA  
.....

Geographical profiles for *H. pylori*

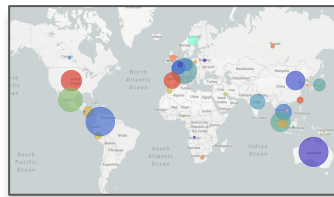

Information of the highest identity branches

strain with highest identity  
**GCF\_009690965.1**

Country: Japan      MLST: -  
Region: Asia      ASM: ASM969096v1  
Institution: University of Western Australia  
Genome submit date: 2019-11-22  
ID: Hp\_009690965

| atpA        | efp        | mutY        | ppa      | trpC       | ureI      | ypjC       |
|-------------|------------|-------------|----------|------------|-----------|------------|
| atpA(-1889) | efp(-2237) | mutY(-1219) | ppa(930) | trpC(-973) | ureI(966) | ypjC(1242) |

Region branch: **G2**

Asia  
100% 193

Country branch: **G2.C31**

Japan  
5

Visualizing of the typing

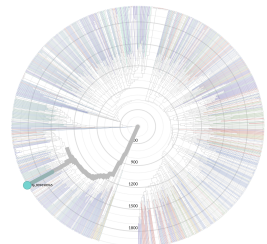

Source: https://www.biorxiv.org/content/10.1101/2021.03.29.437451v1.full.pdf
